# Supplementary material
Source: PubMed Central journal article supplement (PMC8665944)
Supplement: NIHMS1716939-supplement-3.pdf [file NIHMS1716939-supplement-3.pdf]

Supplemental Information

**Intracellular H<sub>2</sub>S production is an autophagy dependent adaptive response to  
DNA damage**

**A high-content screen identifies genotoxic agents as regulators of intracellular  
H<sub>2</sub>S levels in an autophagy dependent response to DNA damage**

Xiaofeng Jiang,<sup>1,\*</sup> Michael R. MacArthur,<sup>2</sup> J. Humberto Treviño-Villarreal,<sup>1</sup> Peter Kip,<sup>1,3,4</sup> C. Keith Ozaki,<sup>3</sup>  
Sarah J. Mitchell,<sup>2,5,\*</sup> James R. Mitchell,<sup>1,2,6</sup>

<sup>1</sup>Department of Molecular Metabolism, Harvard T H Chan School of Public Health, Boston, MA 02115, USA

<sup>2</sup>Department of Health Sciences and Technology, ETH Zurich, 8092 Zurich, Switzerland

<sup>3</sup>Department of Surgery and the Heart and Vascular Center, Brigham & Women's Hospital and Harvard Medical School, MA 02115, USA

<sup>4</sup>Eindhoven Laboratory for Experimental Vascular Medicine and Department of Surgery, Leiden University Medical Center, 2333 C C Leiden, the Netherlands

<sup>5</sup>Lead Contact

<sup>6</sup>Deceased

\*Correspondence: [xjiang@hsph.harvard.edu](mailto:xjiang@hsph.harvard.edu) (X.J.), [smitchell@ethz.ch](mailto:smitchell@ethz.ch) (S.J.M)

Formatted: Font: Bold

Formatted: Font: (Default) Arial, Bold

**Table S1. Small molecule screening data. Related to Figure 1**

| Category          | Parameter                                | Description                                                                                                                                                        |
|-------------------|------------------------------------------|--------------------------------------------------------------------------------------------------------------------------------------------------------------------|
| Assay             | Type of assay                            | A high content cell based phenotypic screen for small molecule compounds that modulate intracellular H <sub>2</sub> S level                                        |
|                   | Target                                   | Biochemical pathways that control cellular H <sub>2</sub> S level                                                                                                  |
|                   | Primary measurement                      | Fluorescence intensity of the reaction product of H <sub>2</sub> S and probe P3 (H <sub>2</sub> S/P3), and the fluorescence intensity of DNA probe DRAQ5 in images |
|                   | Key reagents                             | H <sub>2</sub> S probe P3                                                                                                                                          |
|                   | Assay protocol                           | Described in method section "High-content compound screening"                                                                                                      |
|                   | Additional comments                      |                                                                                                                                                                    |
| Library           | Library size                             | 12,000                                                                                                                                                             |
|                   | Library composition                      | Small molecule Known Bioactives collection                                                                                                                         |
|                   | Source                                   | Harvard ICCB-Longwood Screening Facility                                                                                                                           |
|                   | Additional comments                      | Library described in <a href="https://iccb.med.harvard.edu/known-bioactives-collection">https://iccb.med.harvard.edu/known-bioactives-collection</a>               |
| Screen            | Format                                   | 384-well                                                                                                                                                           |
|                   | Concentration(s) tested                  | 0.1-30 μM                                                                                                                                                          |
|                   | Plate controls                           | DMSO as negative control, 1.3 mM AOAA as positive control                                                                                                          |
|                   | Reagent/ compound dispensing system      | ICCB in-house robot and automated pipettor (Seiko compound transfer robot and Agilent Vprep)                                                                       |
|                   | Detection instrument and software        | Image Xpress Micro (Molecular Devices) and MetaXpress software                                                                                                     |
|                   | Assay validation/QC                      | Z-factor was 0.44 for 1.3 mM AOAA                                                                                                                                  |
|                   | Correction factors                       | No                                                                                                                                                                 |
|                   | Normalization                            | Described in method section "High-content compound screening"                                                                                                      |
|                   | Additional comments                      | P3 was dissolved in DMSO and added to assay plates using automated pipettor (Agilent Vprep).                                                                       |
| Post-HTS analysis | Hit criteria                             | Activators (cell survival >50%, relative intensity of H <sub>2</sub> S/P3 > 1.4)                                                                                   |
|                   | Hit rate                                 | 1 %                                                                                                                                                                |
|                   | Additional assay(s)                      | Described in the method section                                                                                                                                    |
|                   | Confirmation of hit purity and structure | 4 representative compounds for validation were well characterized and purchased from reliable commercial sources.                                                  |
|                   | Additional comments                      |                                                                                                                                                                    |



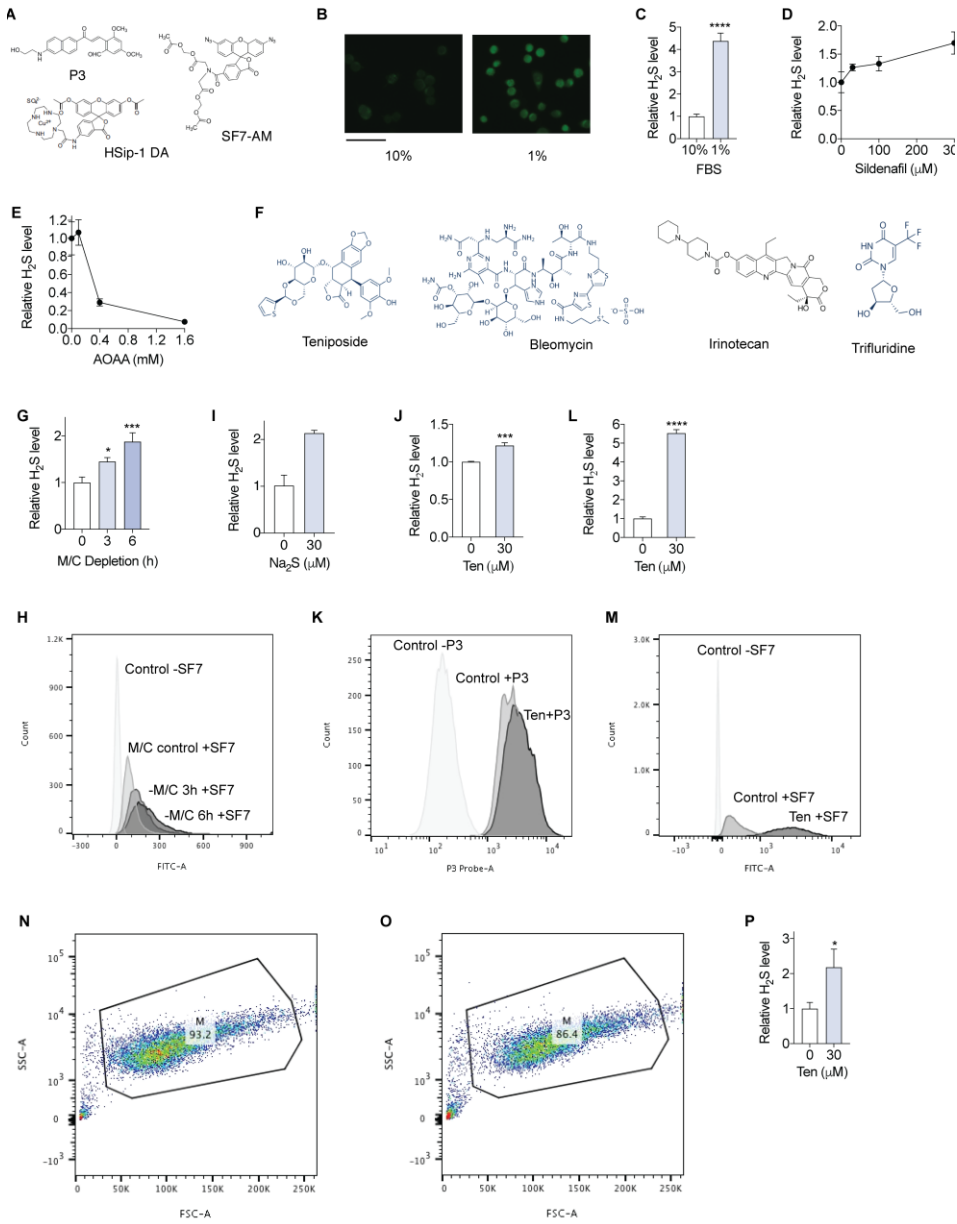

**Figure S1. A high-content screen for small molecule modulators of intracellular H<sub>2</sub>S levels.** Related to Figure 1

(A) Chemical structures of H<sub>2</sub>S probes. (B, C) Validation of P3 imaging assay. Representative P3 fluorescence images of HeLa cells grown in 10% FBS or 1% FBS media for 16 h prior to staining with P3 (B) and quantification of images (n=3 fields) (C). Scale bar, 60 μm. (D, E) Validation of the small molecule screening assay using P3. Intracellular H<sub>2</sub>S levels were measured in HeLa cells treated with sildenafil (D) or AOAA (E) for 20 h (n=4). (F) Chemical structures of 4 representative genotoxic compound hits. (G, H) Validation of SF7-AM flow cytometry assay using M/C depletion. Quantitation of mean SF7-AM fluorescence intensity (G; n=3) and representative histogram (H) from primary MEFs grown in media lacking sulfur amino acids methionine and cysteine (-M/C) for the indicated time, stained with 0.25 μM SF7-AM for 30 min and analyzed by flow cytometry. The cells not stained with SF7 (Control -SF7) were used for the blank control. The control cells (M/C control +SF7) and cells grown in media lacking M/C for 3h (-M/C 3h +SF7) or 6h (-M/C 6h +SF7) were stained with SF7-AM. (I) Validation of SF7-AM flow cytometry assay using H<sub>2</sub>S donor Na<sub>2</sub>S. 0.25 μM SF7-AM was added to the medium of immortalized MEFs, and then fresh Na<sub>2</sub>S PBS solution was added and incubated for 30 min. Intracellular H<sub>2</sub>S levels were measured by flow cytometry (n=2). (J-M) SF7-AM is a more sensitive H<sub>2</sub>S probe than P3 in flow cytometry assays. Quantitation of mean fluorescence intensity (J, L; n=3) and representative histograms (K, M) from immortalized MEFs treated with 30 μM Ten for 4 h, stained with 10 μM P3 (J, K) or 0.25 μM SF7-AM (L, M) for 30 min, and analyzed by flow cytometry. The cells not stained with probe were used for the blank control. The cells treated with 30 μM Ten or vehicle control (DMSO) were stained with probe. (N, O) The gating strategy for SF7-AM stained control (N) and Ten treated MEFs (O). (P) Quantification of P3 fluorescence microscopy images (n=3 fields) as shown in Fig. 1D from HeLa cells treated with Ten. Error bars indicate SD. \* P < 0.05; \*\*\* P < 0.001; \*\*\*\* P < 0.0001. Student's t-test (C, J, L, P); one-way ANOVA (G).

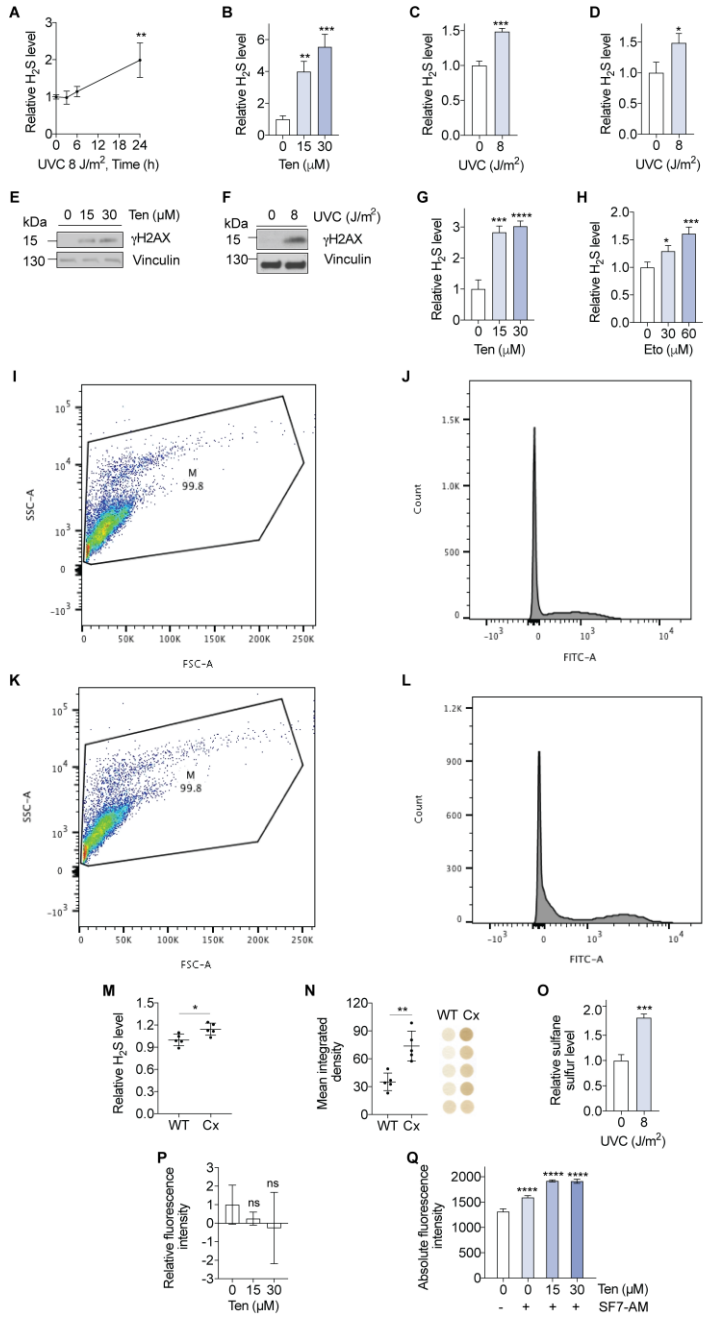

**Figure S2. DNA damage increase sulfide levels *in vitro* and *in vivo*. Relative to Figure 2**

(A) Intracellular H<sub>2</sub>S in immortalized MEFs up to 24 h UVC irradiation as indicated (n=3). (B) Intracellular H<sub>2</sub>S measured using the fluorescent probe HSip-1 DA in primary MEFs treated with Ten for 6 h (n=3). (C, D) Intracellular H<sub>2</sub>S measured using SF7-AM (C) or HSip-1 DA (D) in primary MEFs 24 h after irradiation with 8 J/m<sup>2</sup> UVC (n=3). (E, F) Immunoblots of  $\gamma$ H2AX from primary MEFs treated with Ten for 6 h (E) or 24 h after UVC irradiation (F). (G) Intracellular H<sub>2</sub>S in mouse circulating leukocytes treated *ex vivo* with Ten for 3 h (n=3). (H) Intracellular H<sub>2</sub>S in immortalized MEFs treated with Eto for 6 h (n=3). (I-L) Flow cytometry gating strategy (I, K) and representative histograms (J, L) for circulating leukocytes from WT (I, J) and Cx (K, L) mice shown in Fig. 2H. (M) Intracellular H<sub>2</sub>S (P3 fluorescence) in lung endothelial cells of WT vs. Cx mice (n=5 mice/group). (N) Lead sulfide darkening (right panel) and quantitation (left panel) indicative of H<sub>2</sub>S production capacity of liver extracts from WT vs Cx mice (n=5 mice/group). (O) Intracellular sulfane sulfur in primary MEFs 24 h after UVC irradiation (n=3). (P) Teniposide does not release H<sub>2</sub>S. Relative SF7-AM fluorescence intensity in culture media co-incubated with SF7-AM and Ten for 6 h at 37 °C in a CO<sub>2</sub> incubator (n=3) is shown. (Q) Absolute fluorescence intensity data from media of primary MEFs treated with Ten for 6 h from Fig. 2J (n=3). Error bars indicate SD. ns, not significant; \*P < 0.05; \*\*P < 0.01; \*\*\* P < 0.001; \*\*\*\* P < 0.0001. One-way ANOVA (A, B, G, H, P, Q); Student's t-test (C, D, M-O).

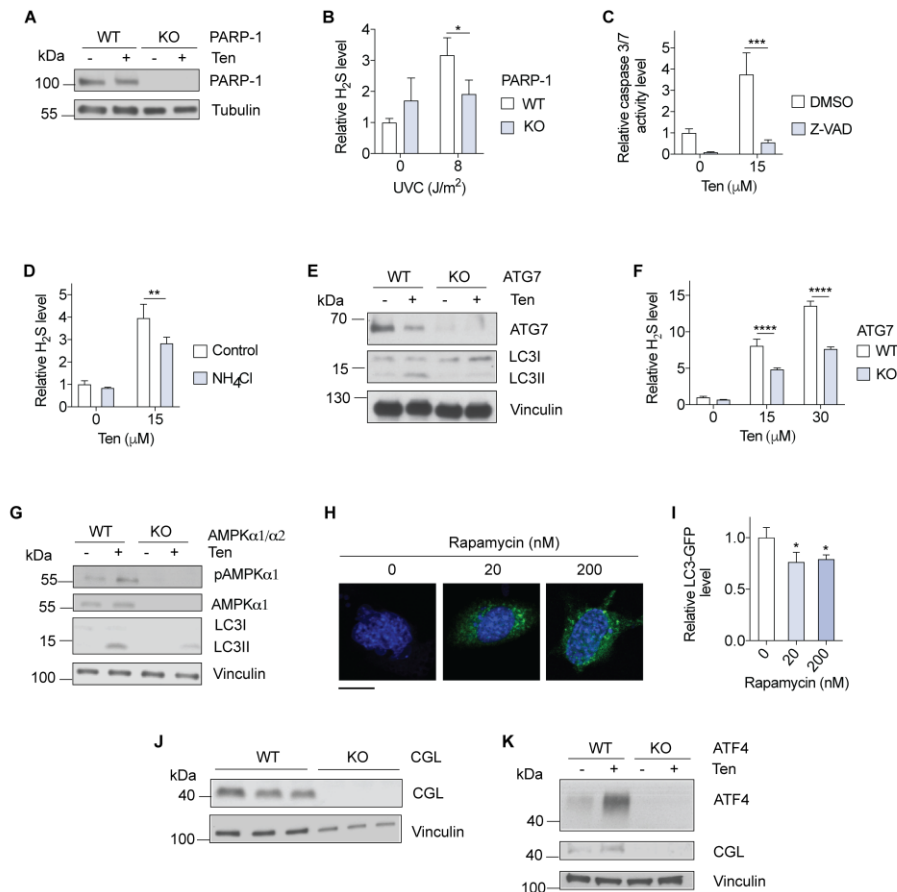

**Figure S3. Autophagy and CGL mediate H<sub>2</sub>S generation upon DNA damage. Relative to Figure 2 and 3**

(A) Immunoblot of PARP-1 in immortalized WT and PARP-1 knockout (KO) MEFs treated with 30 μM Ten for 6 h. (B) Intracellular H<sub>2</sub>S in immortalized WT and PARP-1 KO MEFs 24 h after UVC irradiation (n=3). (C) Caspase 3/7 activity in immortalized MEFs treated with 5 μM pan-caspase inhibitor Z-VAD-FMK (Z-VAD) and Ten as indicated for 24 h (n=3). (D) Intracellular H<sub>2</sub>S in immortalized MEFs treated with 15 μM Ten and 15 mM NH<sub>4</sub>Cl for 6 h (n=3). (E) Immunoblots of the indicated proteins in immortalized WT and ATG7 KO MEFs treated with 30 μM Ten for 6 h. (F) Intracellular H<sub>2</sub>S in WT and ATG7 KO immortalized MEFs treated with Ten for 6 h (n=3). (G) Immunoblots of the indicated proteins in immortalized WT and AMPKα1<sup>-/-</sup>/α2<sup>-/-</sup> MEFs treated with Ten for 6 h. (H, I) Autophagic puncta (green) formation (H) and quantitation of GFP-LC3 levels (I; n=3) in immortalized MEFs expressing GFP-LC3 treated with rapamycin for 24 h. Scale bar, 20 μm. (J) Immunoblot of CGL in primary WT and CGL KO MDFs. (K) Immunoblots of ATF4 and CGL in immortalized WT and ATF4 KO MEFs treated with 30 μM Ten for 6 h. Error bars indicate SD. \*P < 0.05; \*\*P < 0.01; \*\*\*P < 0.001; \*\*\*\*P < 0.0001. One-way ANOVA (I); Two-way ANOVA (B-D, F).



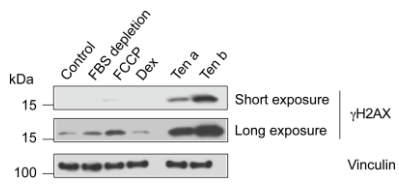

**Figure S4. Effects of serum depletion, FCCP and Dex on DNA damage marker  $\gamma$ H2AX levels.**  
**Relative to Figure 4**

Immunoblots of  $\gamma$ H2AX in immortalized MEF cells treated with serum (FBS) depletion, 20  $\mu$ M FCCP, 150  $\mu$ M Dex, or 3.75  $\mu$ M (Ten a), 7.5  $\mu$ M (Ten b) teniposide for 6h.
